# Supplementary material
Source: PubMed Central journal article supplement (PMC3061029)

## SUPPLEMENTARY MATERIAL

### Primers used for PCR

#### Genotyping

##### *cat-2(1112):*

GGCAGAGTAGATTTCCAAAG

ATCTGAGGAATCCTATCCGCTGTCAAACCTTCTCCCTT

##### *dop-4(ok1321):*

GGGCTCAGGATAGAGATTG

TGGAGAATCAGCTCTATTGC

#### Promoter amplification

##### *dop-4:*

ATTACAAAAGCCCAGCCAG

TTTGATGTAGGCTAATTGCTG

#### Rescue transgenes

##### *dop-4:*

AATGTTGGCTTACGGGTC

CTATTCAATTGAAGTATTCGGCG

#### RNAi constructs

##### *dop-4* sense:

GCTTTTTGGCCTGATGATGT

CTGGAAAATTTGGGGGATTT

*dop-4* antisense

GCTTTTGGCCTGATGATGT

CTGGAAAATTTGGGGATTT

### **Supplementary Figure 1. Measurements of ASH calcium transient duration.**

A-F) Average area under the curve for calcium imaging experiments. A) Area is not increased by food in responses to 2 mM CuCl<sub>2</sub>. B) In wild type, the area in responses to 0.5 M glycerol is increased by both food and dopamine ( $p < 0.0035$ , Mann-Whitney rank sum test;  $N \geq 7$ ). In *cat-2(e1112)* the area is unaffected by food. C) The area in response to 2 mM CuCl<sub>2</sub> is increased by exogenous dopamine in wild type and *dop-4(ok1321)* ( $p < 0.0035$ , Mann-Whitney rank sum test;  $N \geq 8$ ). D) Nose touch responses are unaffected by dopamine and serotonin. E) In wild type, the area in post-chronic responses to 10 mM CuCl<sub>2</sub> is increased by both food and dopamine ( $p < 0.01$ , Mann-Whitney rank sum test;  $N \geq 11$ ). In *cat-2(e1112)* the area is unaffected by food. F) In wild type, the area in post-chronic responses to 10 mM CuCl<sub>2</sub> is increased by both food and dopamine ( $p < 0.05$ , Mann-Whitney rank sum test;  $N \geq 6$ ). In *cat-2(e1112)* the area is unaffected by food.

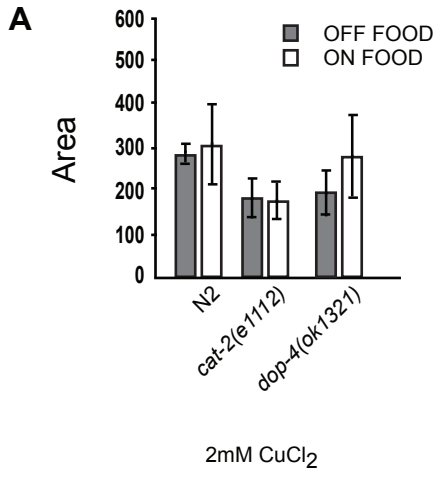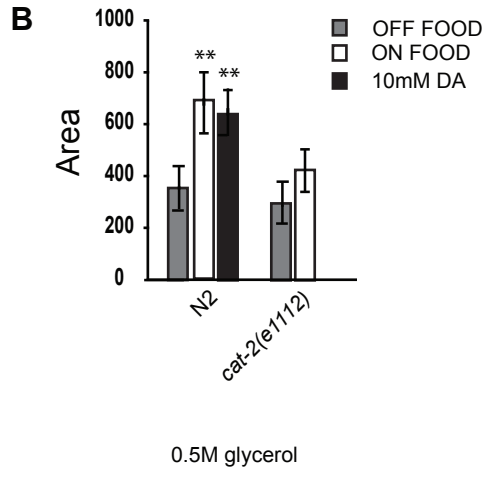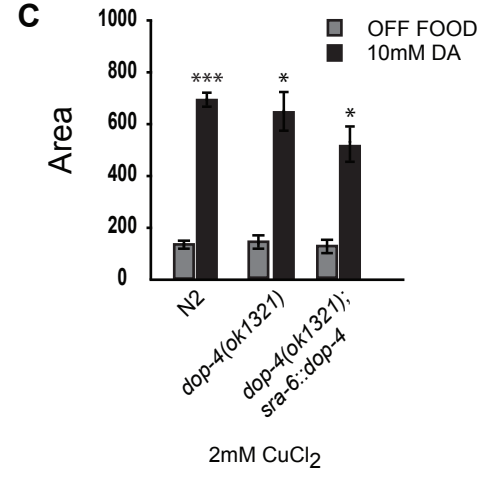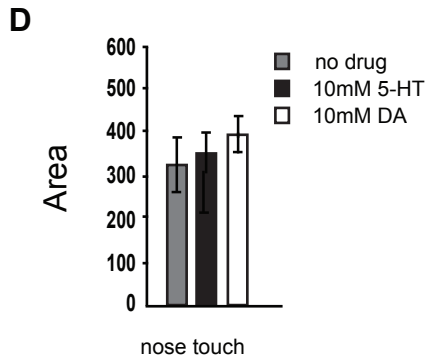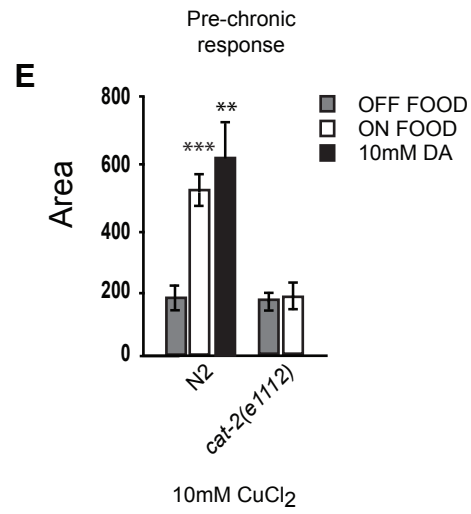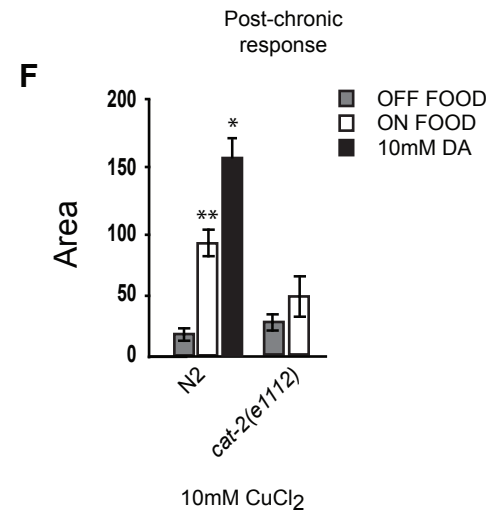

Supplement: emboj201122s1.pdf [file emboj201122s1.pdf]
